# Supplementary material for: Entrepreneurship in family firms: an updated bibliometric overview
Source: Springer Nature journal article supplement (doi:10.1007/s11846-023-00650-z), 2023-03-22
Supplement: MOESM1 [file 24663962]

David Kloss • Dählmannsweg 22 • 26135 Oldenburg (Deutschland)  
0163/4287351 • davekloss144@gmail.com

Oldenburg, Germany, February 13<sup>th</sup>, 2023

### **Certificate of Proofreading**

Ladies and Gentlemen,

This letter is to confirm my proofreading of the text *Entrepreneurship in family firms: An updated bibliometric overview* from February 8<sup>th</sup> to 9<sup>th</sup> of this year.

You can best reach me at [davekloss144@gmail.com](mailto:davekloss144@gmail.com) for any further questions you may have.

All the best,

A handwritten signature in blue ink, appearing to read 'David Kloss', with a stylized flourish at the end.

David Kloss  
Dählmannsweg 22  
26135 Oldenburg  
Germany
